# Supplementary material
Source: Springer Nature journal article supplement (https://www.springermedizin.de/resource/supplementary/12959_2005_35_MOESM3_ESM.pdf/9569400)

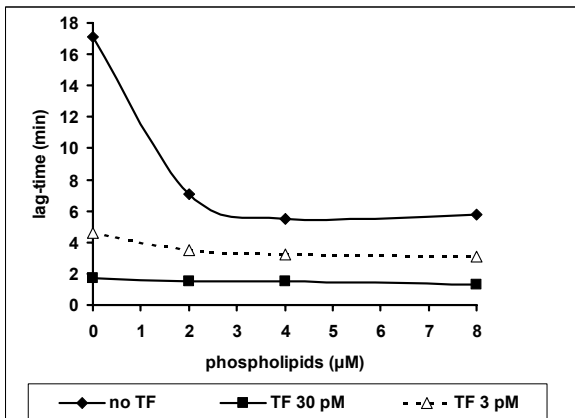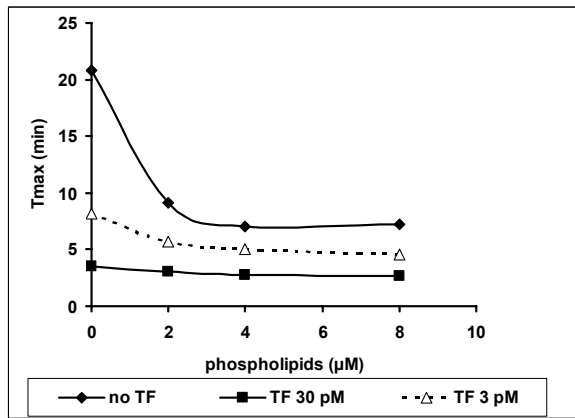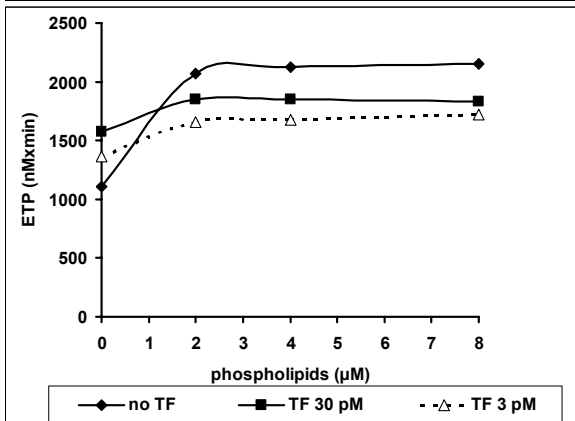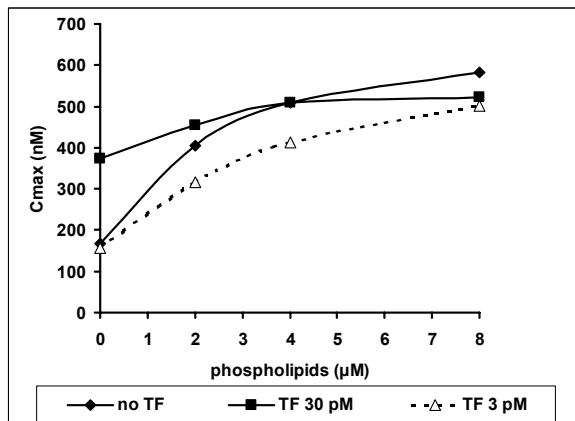

Supplement: MOESM3 [file 9569400]
